# Supplementary material for: Vitronectin and Its Interaction with PAI-1 Suggests a Functional Link to Vascular Changes in AMD Pathobiology
Source: MDPI journal article supplement (doi:10.3390/cells11111766), 2022-05-27
Supplement: s1 [file s1]

## Supplementary Material

### **Vitronectin and its interaction with PAI-1 suggests a functional link to vascular changes in AMD pathobiology**

Fabiola Biasella <sup>1</sup>, Tobias Strunz <sup>1</sup>, Christina Kiel <sup>1</sup>, International AMD Genomics Consortium (IAMDGC) <sup>2</sup>, Bernhard H. F. Weber <sup>1,3</sup> and Ulrike Friedrich <sup>1</sup>

- <sup>1</sup> Institute of Human Genetics, University of Regensburg, Franz-Josef-Strauss-Allee 11, 93053 Regensburg, Germany
- <sup>2</sup> John P. Hussman Institute for Human Genomics, University of Miami, Miami, FL 33136, USA
- <sup>3</sup> Institute of Clinical Human Genetics, University Hospital Regensburg, Franz-Josef-Strauss-Allee 11, 93053 Regensburg, Germany

Correspondence: U.F. [Ulrike.Friedrich@klinik.uni-regensburg.de](mailto:Ulrike.Friedrich@klinik.uni-regensburg.de); Tel.: +49 941-944-5428; Fax: +49 941-944-5402; B.H.F.W. [bweb@klinik.uni-regensburg.de](mailto:bweb@klinik.uni-regensburg.de); Tel.: +49 941-944-5400; Fax: +49 941-944-5402

**Supplementary Table S1.** Primer sequences, target and application in expression cloning or real-time quantitative PCR.

| Target                                                  | Primer/probe name      | Primer/probe Sequence (5'-3')              | Application                             | Polymerase/<br>MasterMix                                                                                                                    | F: |
|---------------------------------------------------------|------------------------|--------------------------------------------|-----------------------------------------|---------------------------------------------------------------------------------------------------------------------------------------------|----|
| <i>PAI-1</i>                                            | PAI-1-EcoRI-F          | F:gaattcATGCAGATGTCTCCAGC<br>CCTCA         | Cloning of<br>pEXPR-IBA103-<br>PAI-1    | GoTaq®<br>DNA<br>Polymerase<br>(Promega<br>Corporation,<br>Madison,<br>WI, USA)                                                             |    |
|                                                         | PAI-1-<br>XhoIwostop-R | R:ctcgagGGGTTCATCACTTGGC<br>CCAT           |                                         |                                                                                                                                             |    |
|                                                         | PAI-1-seq1-F           | F:acagacgcgatcttgggtcca                    | Sequencing of<br>pEXPR-IBA103-<br>PAI-1 | AmpliTaq®<br>DNA<br>Polymerase<br>(BigDye<br>Terminator<br>v1.1 Cycle<br>Sequencing<br>Kit, Thermo<br>Fisher)                               |    |
|                                                         | PAI-1-seq2-F           | F:TATACTGAGTTCACCACGCC<br>G                |                                         |                                                                                                                                             |    |
| Expressio<br>n vector<br>(flanking<br>cloning<br>sites) | pEXPR-IBA3-F           | F:GAGAACCCACTGCTTACTGGC                    |                                         |                                                                                                                                             |    |
|                                                         | pEXPR-IBA3-R           | R:TAGAAGGCACAGTCGAGG                       |                                         |                                                                                                                                             |    |
| <i>PAI-1</i>                                            | FH1_SERPINE1           | F:GCTGCAGAAAGTGAAGATCG                     | Real-Time<br>quantitative<br>PCR        | Takyon™<br>DNA<br>Polymerase<br>(Takyon™<br>Low ROX<br>Probe 2X<br>MasterMix<br>dTTP blue;<br>Eurogentec,<br>Seraing,<br>Liège,<br>Belgium) |    |
|                                                         | RH1_SERPINE1           | R:GTCCATGATGATCTCCTCGG                     |                                         |                                                                                                                                             |    |
|                                                         | PH1_SERPINE1           | P:(6FAM)GTGGCCTCCTCATCCA<br>ACAGCTGTC(OQA) |                                         |                                                                                                                                             |    |
| <i>HPRT1</i>                                            | FH1_HPRT1              | F:CTTTGCTTTCCTTGGTCAGG                     |                                         |                                                                                                                                             |    |
|                                                         | RH1_HPRT1              | R:TCAAATCCAACAAAGTCTGG<br>C                |                                         |                                                                                                                                             |    |
|                                                         | PH1_HPRT1              | P:(6FAM)GCTTGCTGGTGAAAAG<br>GACCCACG(OQA)  |                                         |                                                                                                                                             |    |

Forward; R: Reverse; P: Probe

**Supplementary Table S2.** Antibodies, their dilution, application, and origin.

| Antibodies                                                                   | Dilution        | Application | Manufacturer (Country)                                   |
|------------------------------------------------------------------------------|-----------------|-------------|----------------------------------------------------------|
| $\alpha$ -VTN<br>(MAB2349)                                                   | 1:5000<br>1:250 | WB<br>IF    | R&D Systems, Inc., Minneapolis, MN,<br>USA               |
| $\alpha$ -PAI-1<br>(11907S)                                                  | 1:1000<br>1:100 | WB<br>IF    | Cell Signaling Technology, Danvers,<br>MA, USA           |
| $\alpha$ -ACTB<br>(A5441)                                                    | 1:10000         | WB          | Sigma-Aldrich, St. Louis, MO, USA                        |
| Goat Anti-Mouse IgG,<br>Peroxidase conjugated                                | 1:10000         | WB          | (Calbiochem) Merck Chemicals GmbH,<br>Darmstadt, Germany |
| Goat Anti-Rabbit IgG,<br>Peroxidase conjugated                               | 1:10000         | WB          | (Calbiochem) Merck Chemicals GmbH,<br>Darmstadt, Germany |
| Goat Anti-Mouse IgG,<br>Alexa Fluor $\text{\textcircled{R}}$ 594 conjugated  | 1:800           | IF          | ThermoFisher Scientific, Waltham, MA,<br>USA             |
| Goat Anti-Rabbit IgG,<br>Alexa Fluor $\text{\textcircled{R}}$ 488 conjugated | 1:800           | IF          | ThermoFisher Scientific, Waltham, MA,<br>USA             |

WB = Western Blot, IF = Immunofluorescence

## Supplementary Figure S1

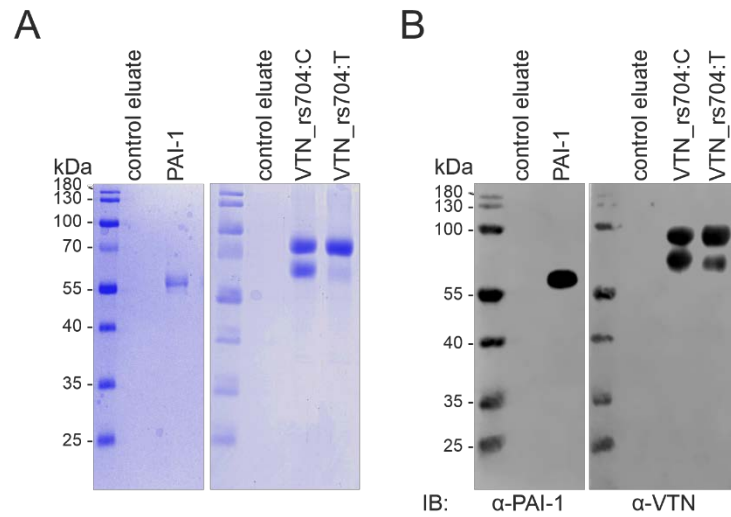

**SUPPLEMENTARY FIGURE S1.** Purification of Strep-tagged PAI-1, VTN\_rs704:C and VTN\_rs704:T. Purified recombinant proteins were subjected to SDS-PAGE and analysed *via* (A) Coomassie blue staining and (B) immunoblot (IB) analysis using antibodies against PAI-1 and vitronectin. Eluate obtained from cultivation medium of HEK293-EBNA transfected with empty pEXPR-IBA103 vector and subjected to the same purification procedure served as a control (control eluate).

## Supplementary Figure S2

A

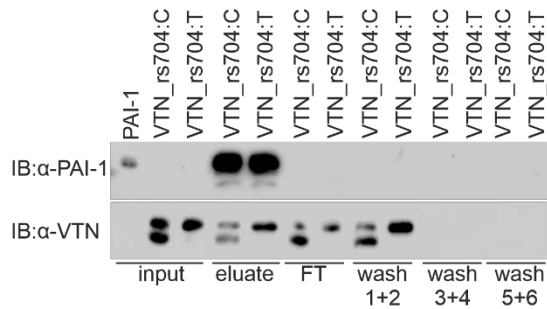

B

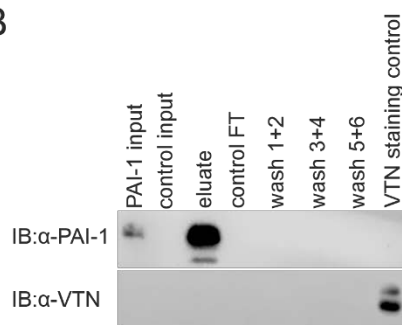

C

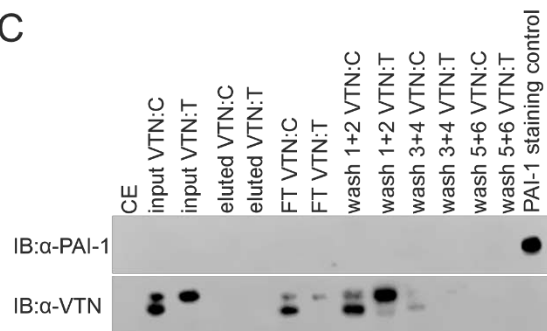

**SUPPLEMENTARY FIGURE S2.** Controls for the co-precipitation experiments. (A) Full-size western blots of Figure 2A, also revealing flow through (FT) and wash fractions (wash) prior to PAI-1 elution. (B) Vitronectin-free control input was loaded onto columns coupled with PAI-1 and subjected to the identical experimental procedure described for the vitronectin-containing input. After immunoblot (IB) analyses with antibodies against vitronectin, no staining was detected in the experimental fractions analysed. (C) Potential non-specific binding of vitronectin to the column material was tested by loading the vitronectin-containing input onto columns free of PAI-1 (coupled with empty control eluate; CE) and subjected to the same experimental procedure as described above. After IB analysis with antibodies against vitronectin and PAI-1, vitronectin was not detected in the elution fractions, but only in flow through and wash fractions, excluding non-specific binding of vitronectin to the column material.

### Supplementary Figure S3

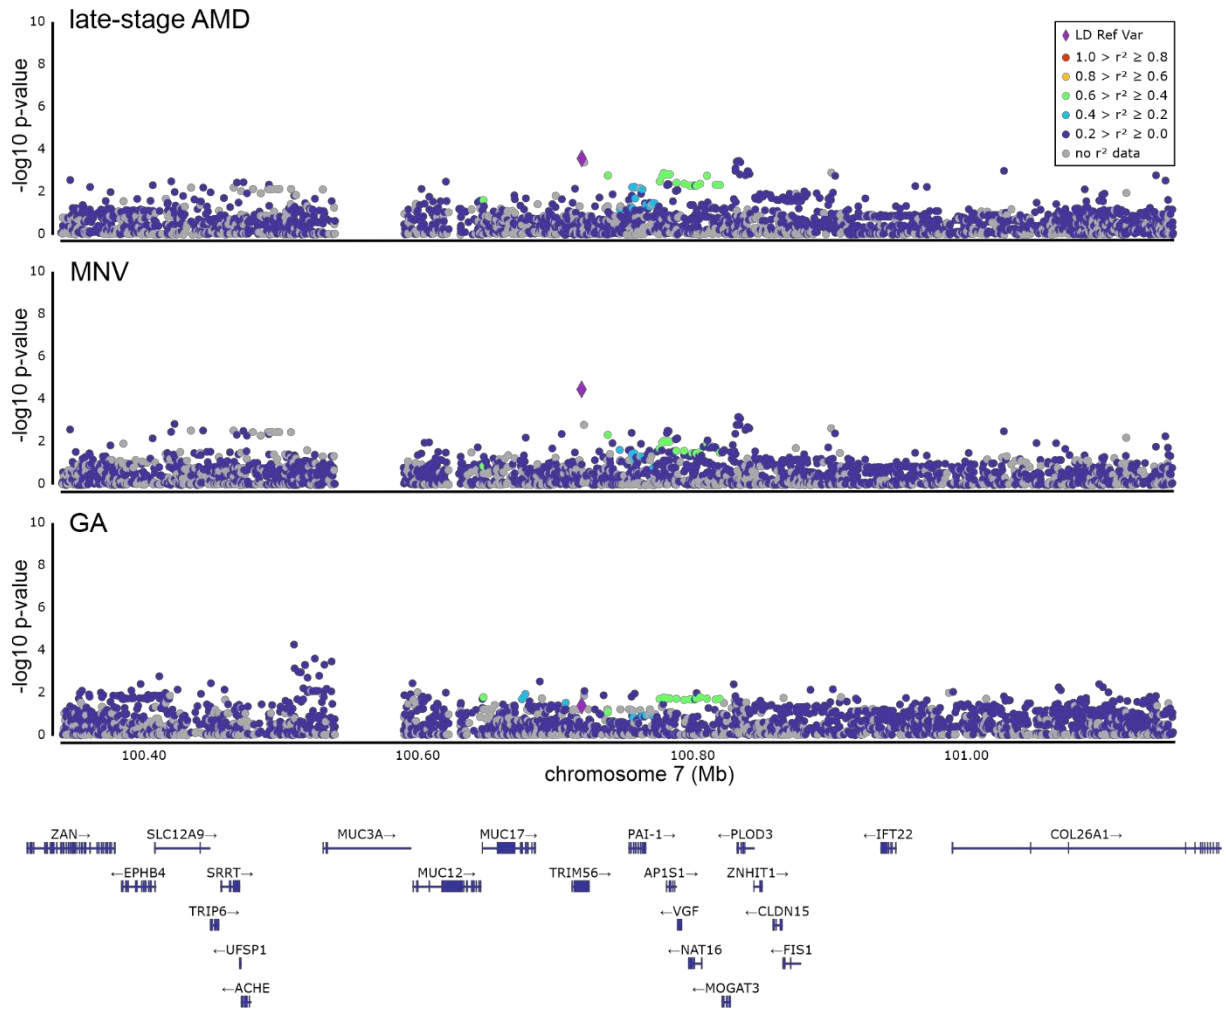

**SUPPLEMENTARY FIGURE S3.** Association of the genetic locus harboring the *PAI-1* gene with late-stage AMD phenotypes (all) and subgroups neovascular AMD (NV-AMD) and geographic atrophy (GA-AMD). The analysis within the IAMDC dataset revealed only a minor association signal at this locus and low level of linkage disequilibrium (LD) among genetic variants in the selected intervals hampering association mapping. The variant with the smallest p-value, namely rs28709821, is presented as purple diamond and serves as linkage disequilibrium (LD) reference variant. Plots were generated with Locuszoom [26, 27]. A gene map with direction of transcription is shown at the bottom.

### Supplementary Figure S4

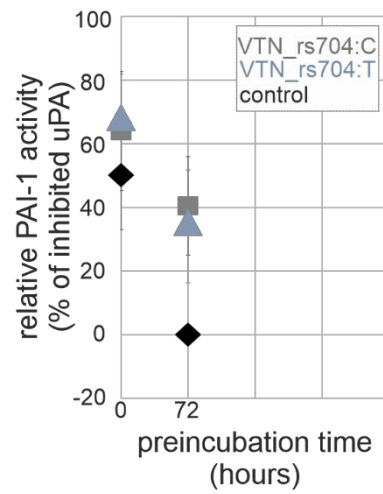

**SUPPLEMENTARY FIGURE S4.** PAI-1 activity assay after 0 and 72 hours preincubation of PAI-1 and vitronectin. VTN\_rs704:C (grey squares), VTN\_rs704:T (ice-blue triangles), or control eluate (control, black diamonds) were mixed with PAI-1 and incubated at 37°C. Aliquots of vitronectin/PAI-1 or control eluate/PAI-1 mixtures were subjected to the PAI-1 activity assay after 0 and 72 hours, measuring PAI-1-dependent uPA activity. The data were calibrated against the values obtained for control measurements at 72 hours (uPA at its maximum activity in our experimental setting, 100%). To better visualize the extent of PAI-1 inhibition and thus the inhibitory capacity of PAI-1, the calibrated uPA activity was subtracted from 100 % (maximal uPA activity). Data represent the mean  $\pm$  SD of 3 replicates.

## Supplementary Figure S5

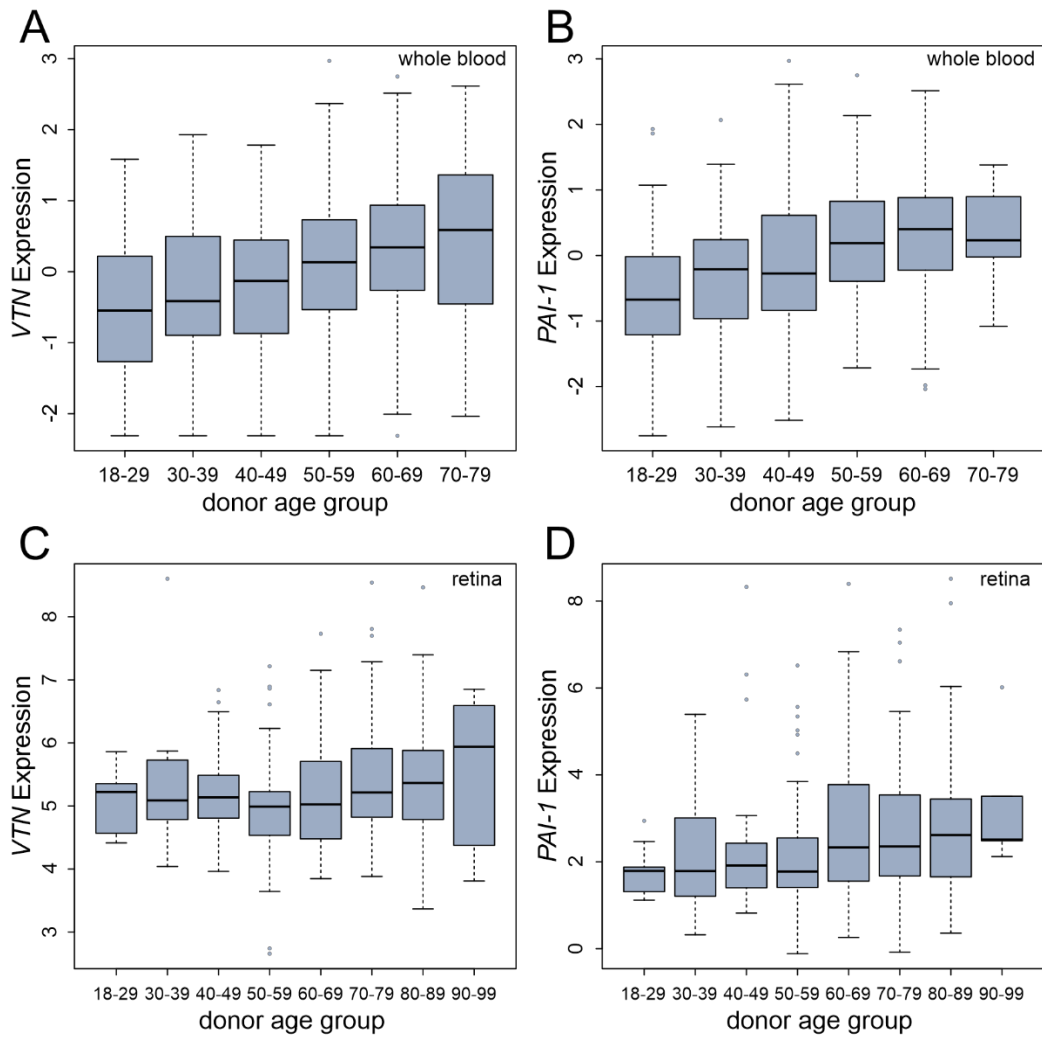

**SUPPLEMENTARY FIGURE S5.** Gene expression of *VTN* and *PAI-1* in human blood and retina separated by age groups. Donor individuals from whole blood samples (n = 556) [20] and healthy retinal tissues (n = 311) [22] were grouped according to their age at tissue donation. Shown are gene expression of (A) *VTN* and (B) *PAI-1* in whole blood and (C-D) in retinal tissue samples.
